# Supplementary material for: HN1 Is Enriched in the S-Phase, Phosphorylated in Mitosis, and Contributes to Cyclin B1 Degradation in Prostate Cancer Cells
Source: MDPI journal article supplement (doi:10.3390/biology12020189), 2023-01-26
Supplement: s1 [file s1]

(a)

HN1 (22 kDa)

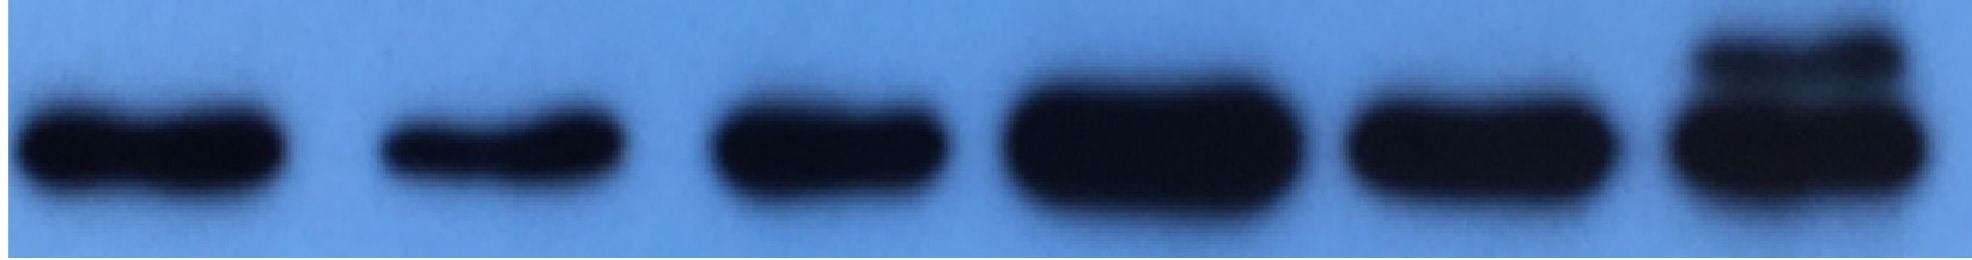

$\beta$ -actin (42 kDa)

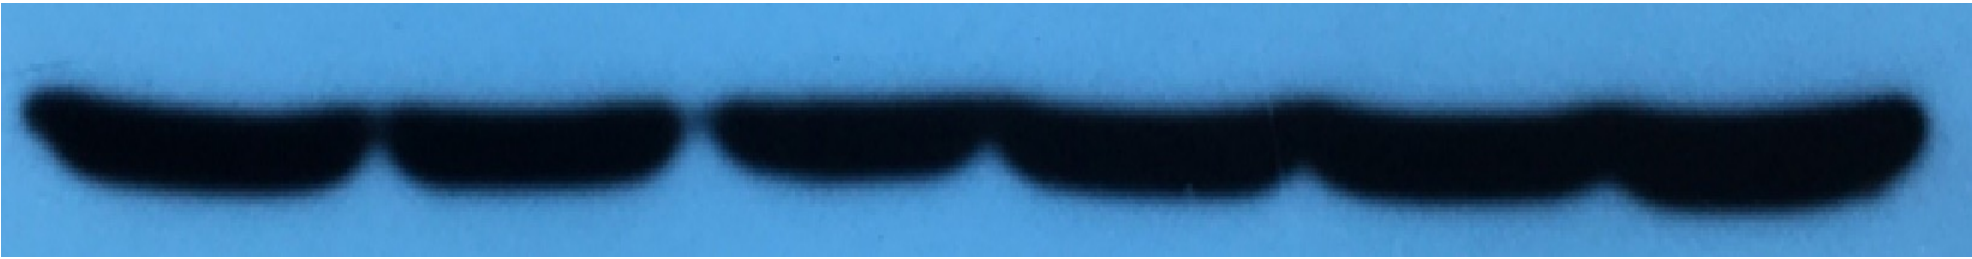

(b)

HN1 (22 kDa)

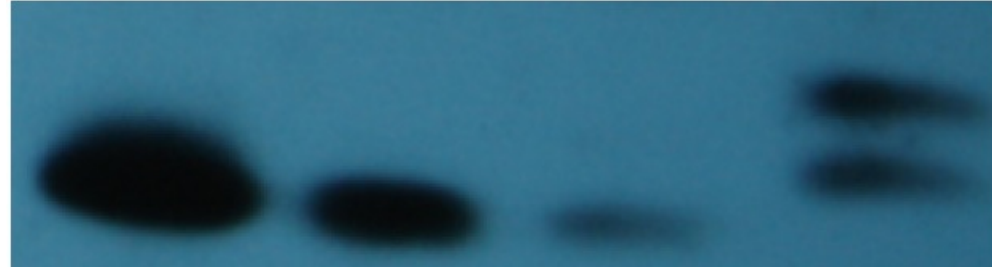

$\beta$ -actin (42 kDa)

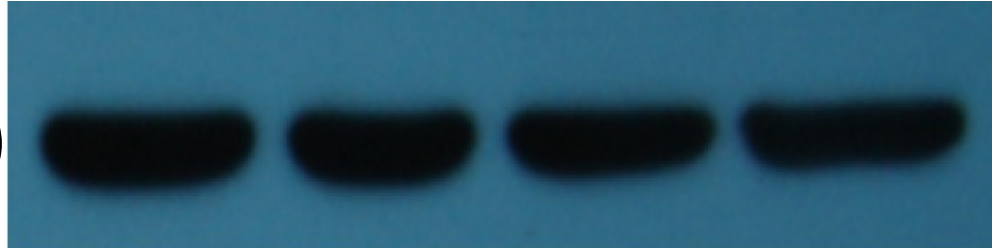

(c)

HN1 (22 kDa)

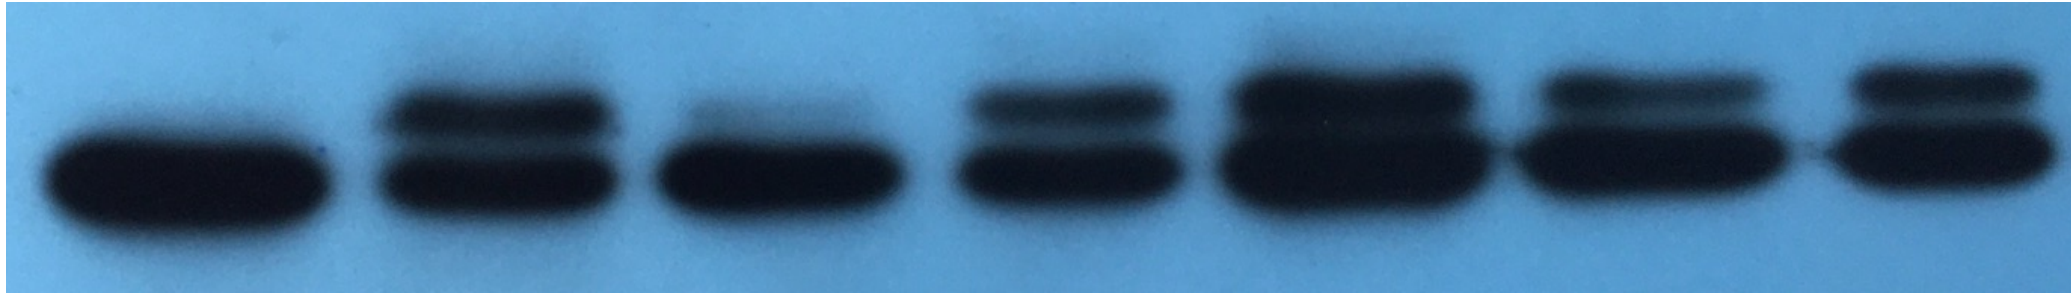

(d)

HN1 (22 kDa)

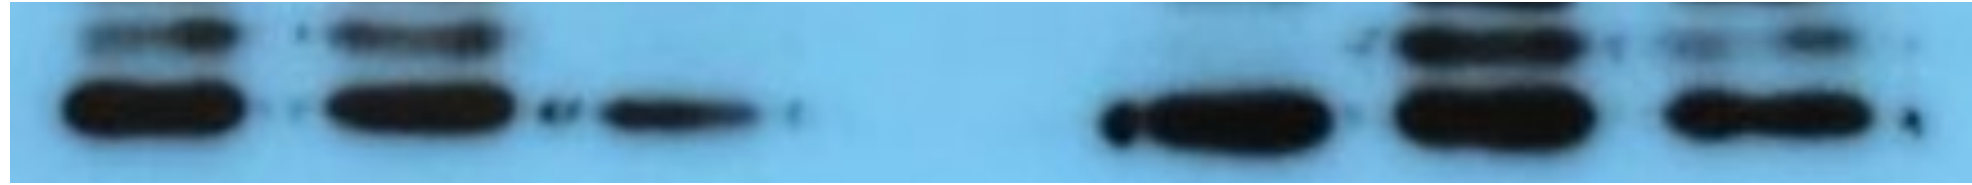

$\beta$ -actin (42 kDa)

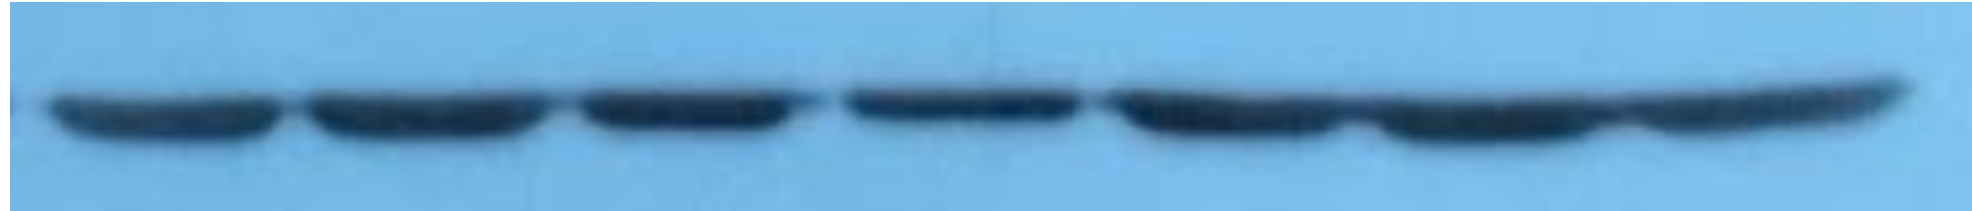

(e)

Cyclin B1 (55 kDa)

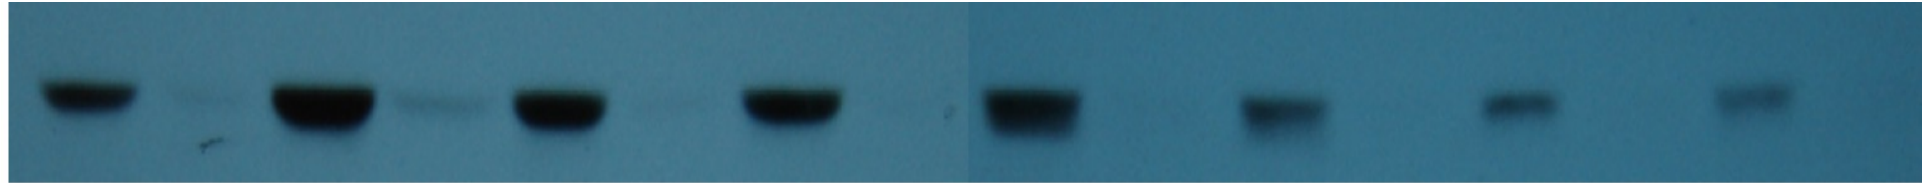

pH3<sub>(S10)</sub> (15 kDa)

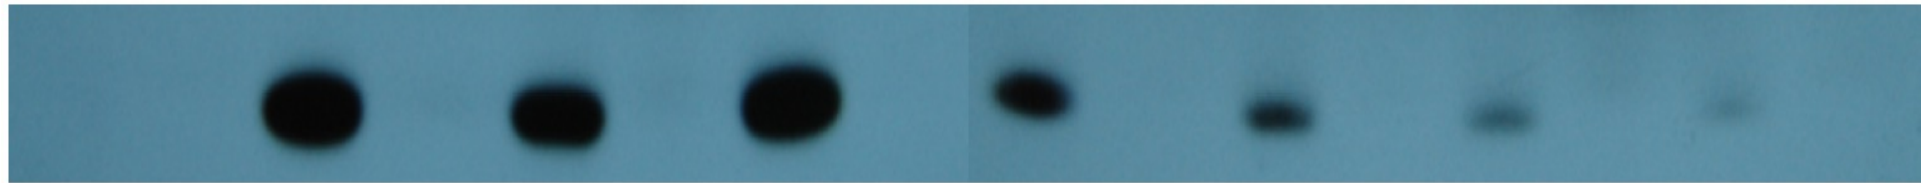

HN1 (22 kDa)

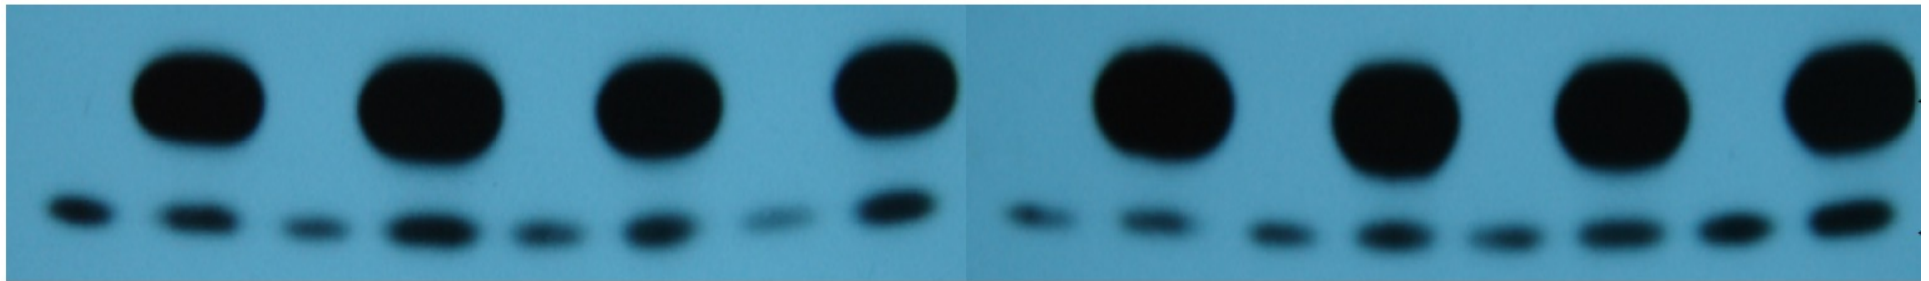

$\beta$ -actin (42 kDa)

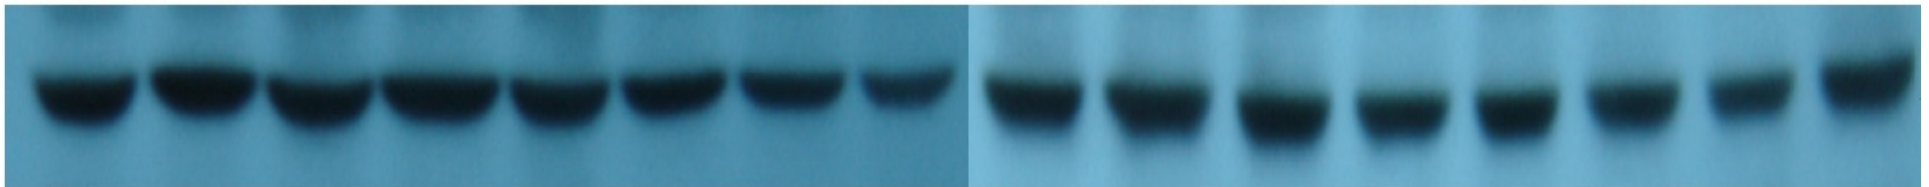

(f)

HN1 (22 kDa)

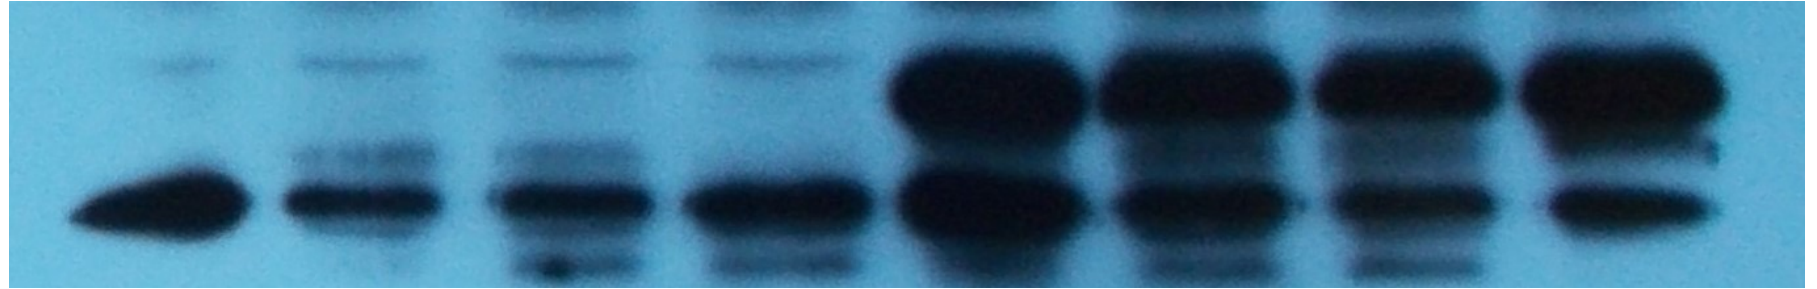

$\beta$ -actin (42 kDa)

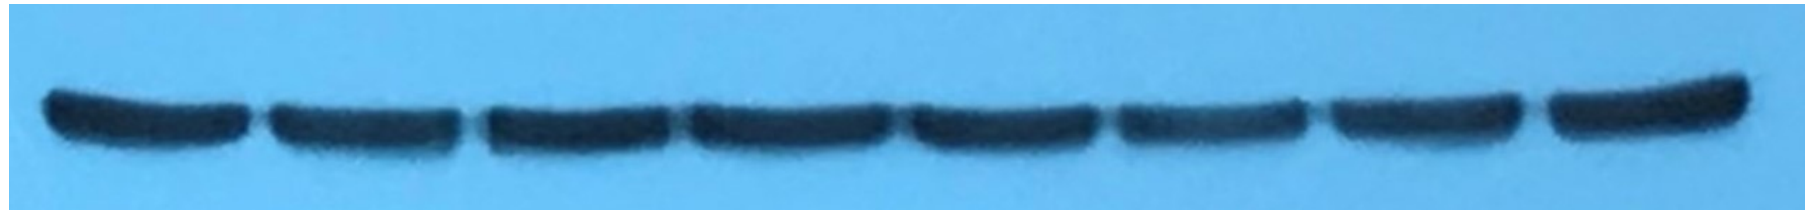



(g)

Cyclin B1 (55 kDa)

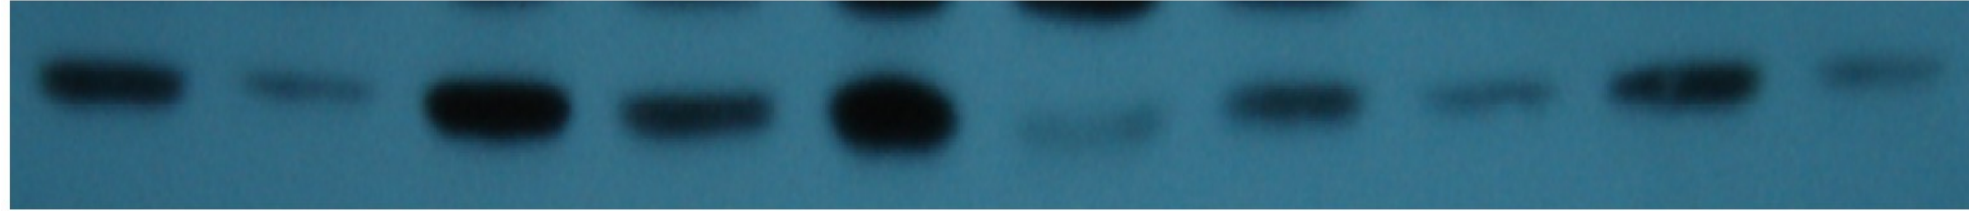

pH3<sub>(S10)</sub> (15 kDa)

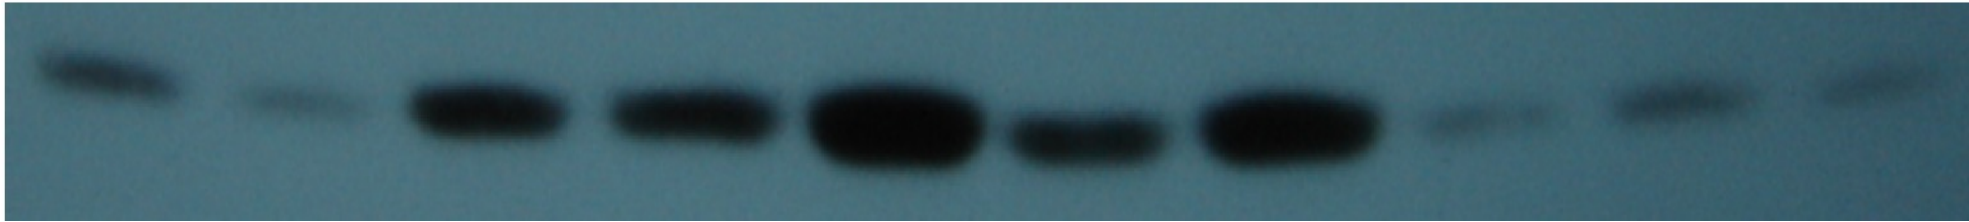

HN1 (22 kDa)

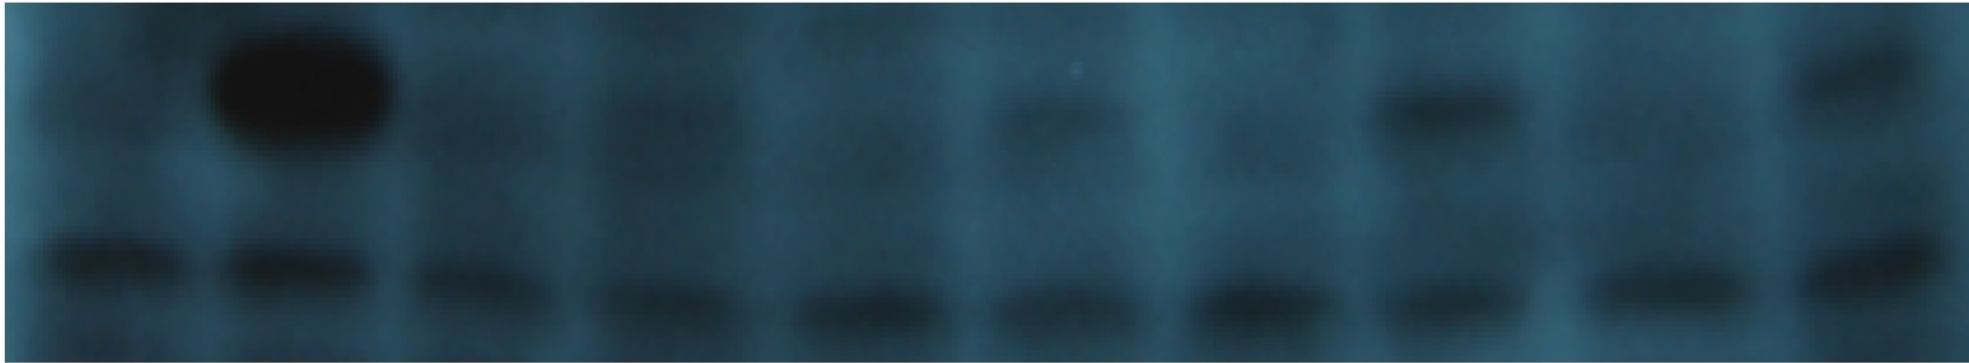

$\beta$ -actin (42 kDa)

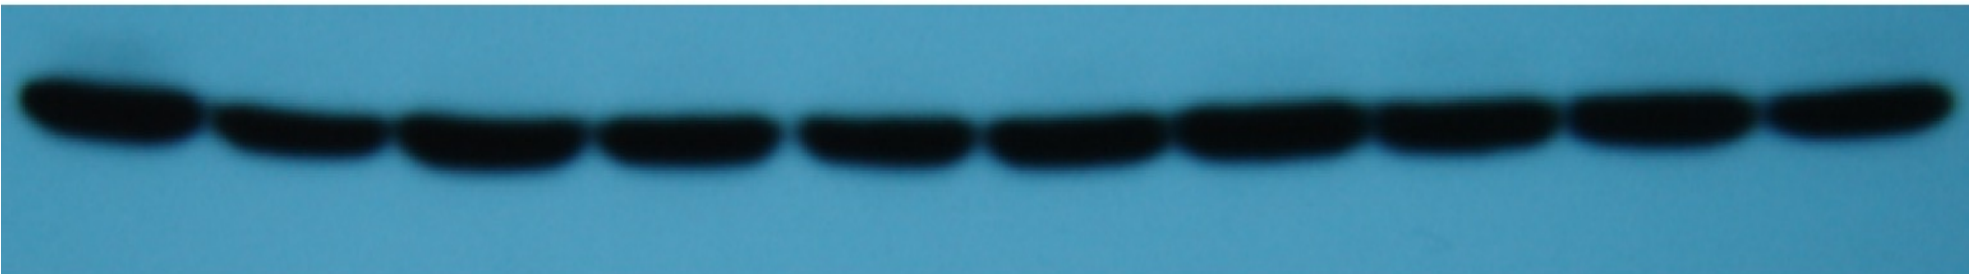

(h)

HN1 (22 kDa)

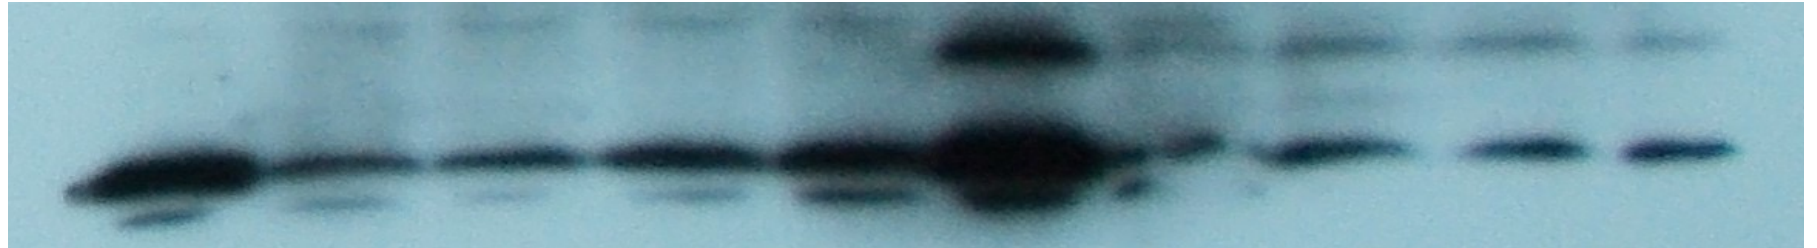

Cdt1 (65 kDa)

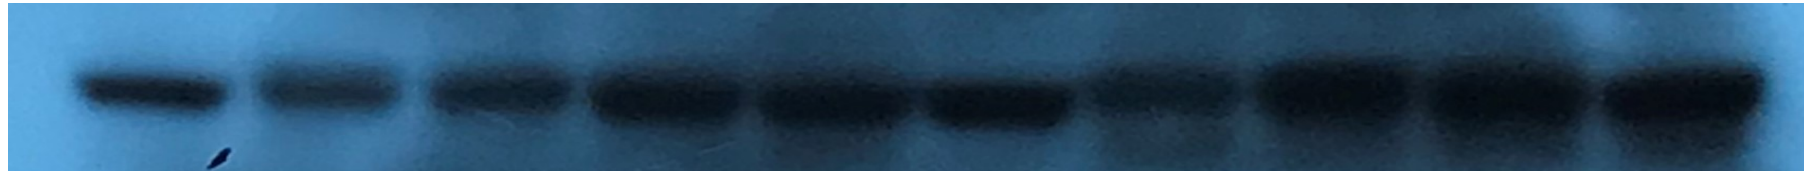

$\beta$ -actin (42 kDa)

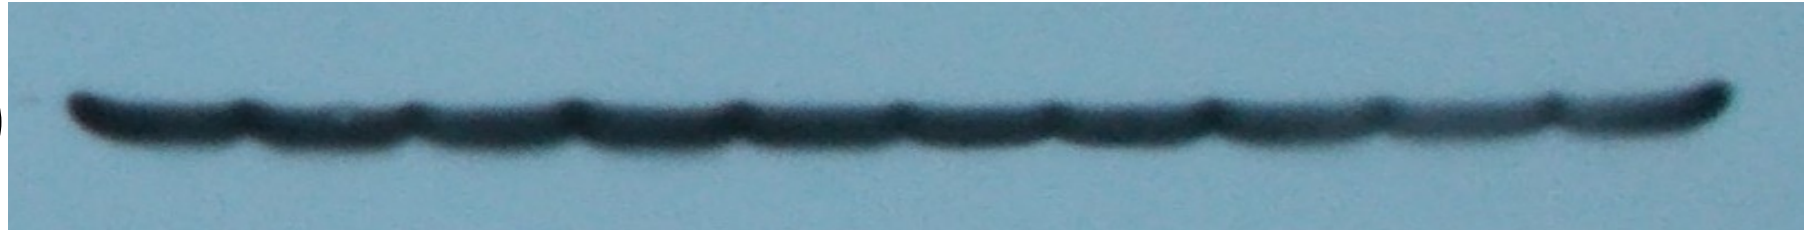



(i)

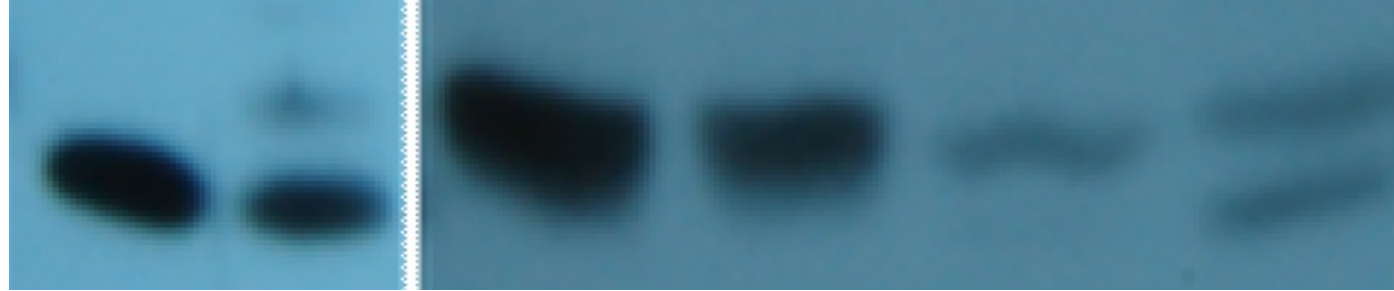

HN1 (22 kDa)

(j)

Cyclin B1 (55 kDa)

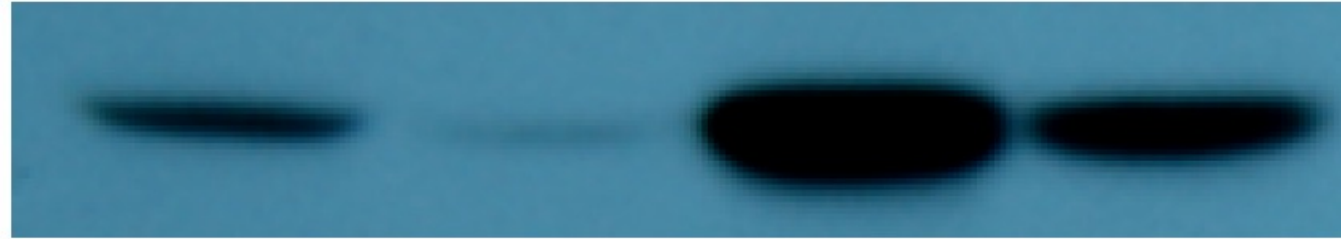

HN1 (22 kDa)

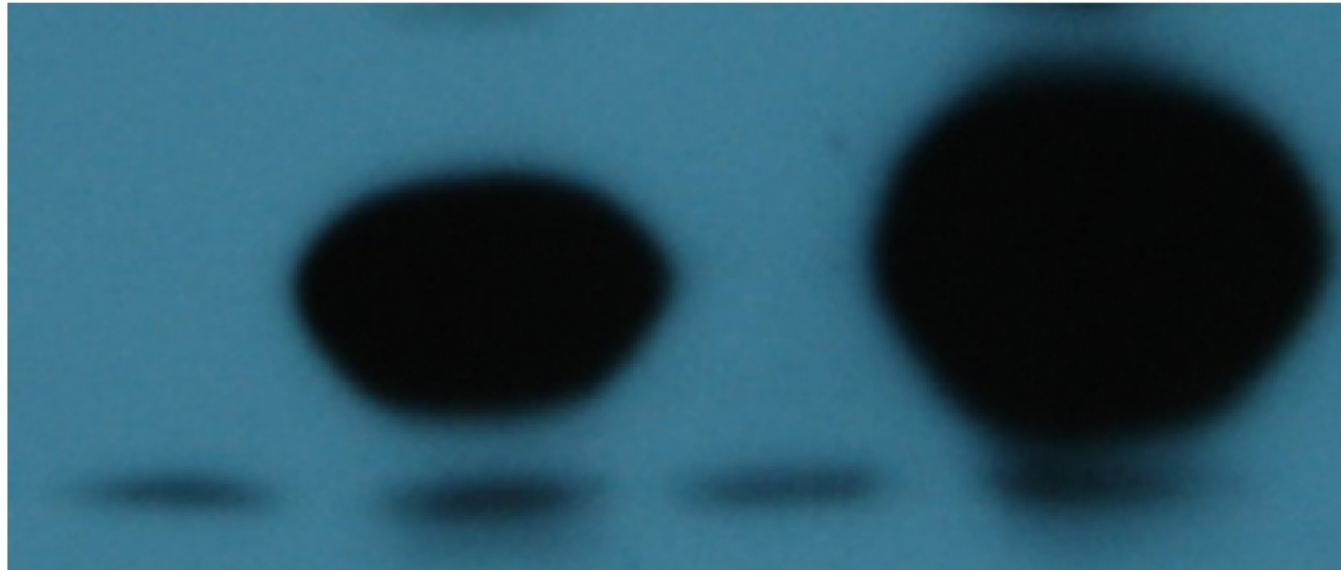

$\beta$ -actin (42 kDa)

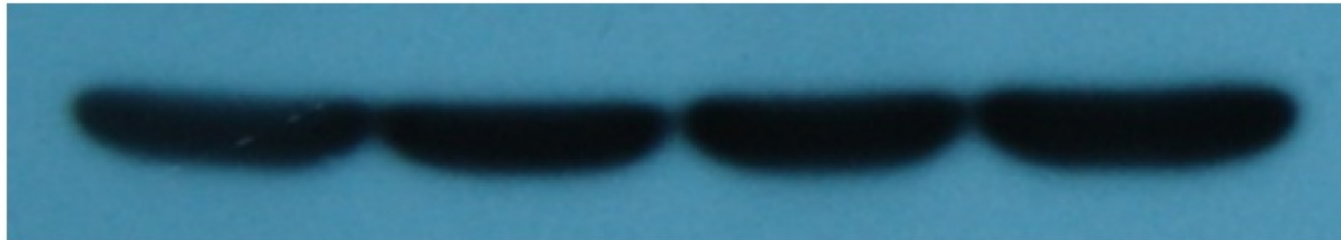

Cdc20 (55 kDa)

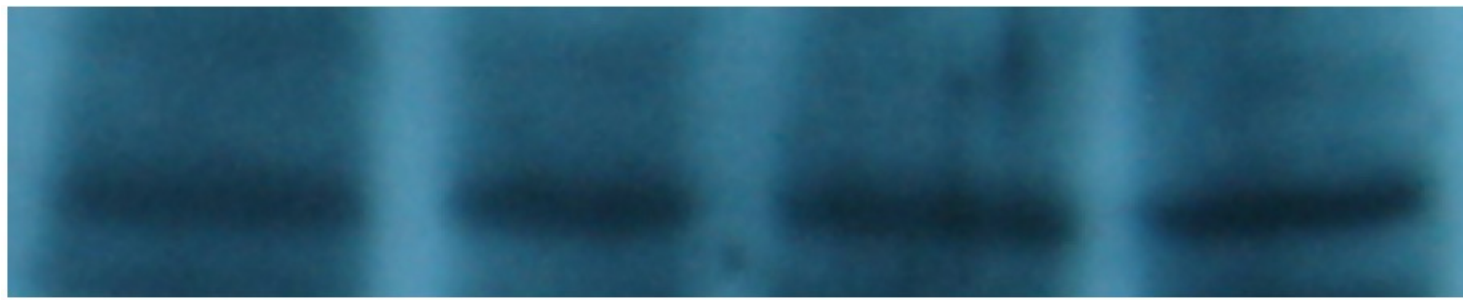

Cdh1/Fzr1 (55 kDa)

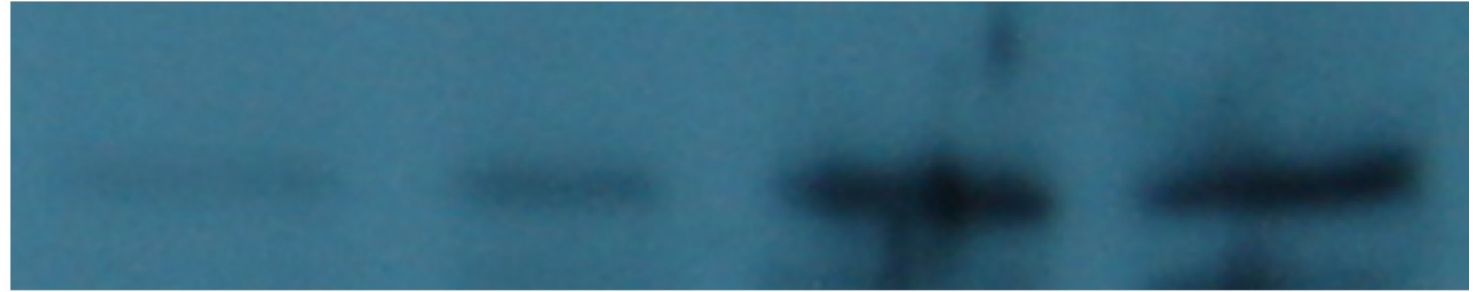

HN1 (22 kDa)

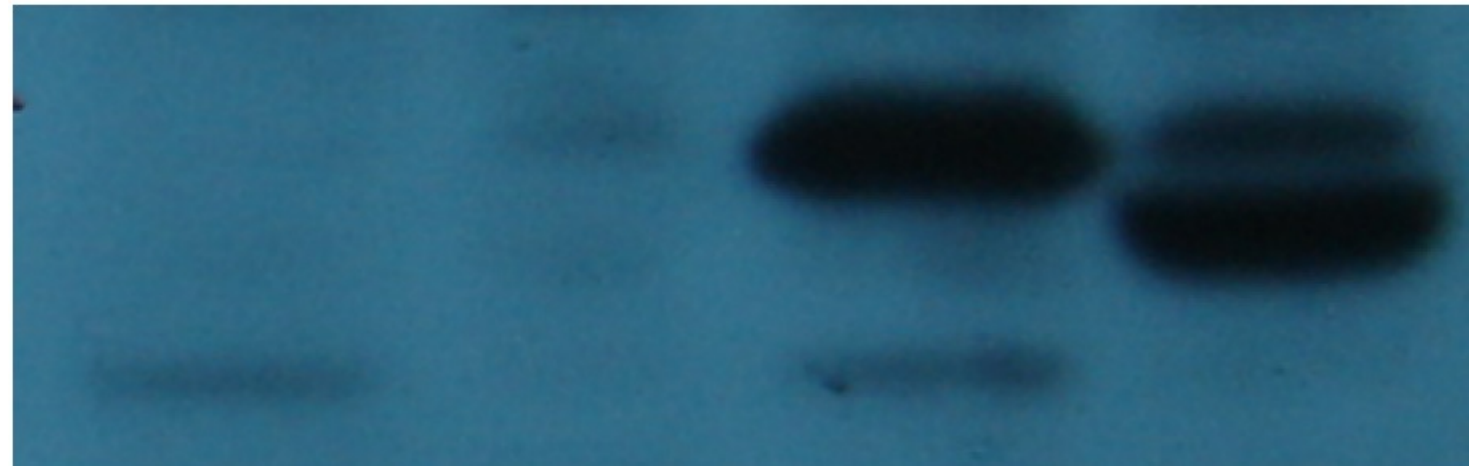

$\beta$ -actin (42 kDa)

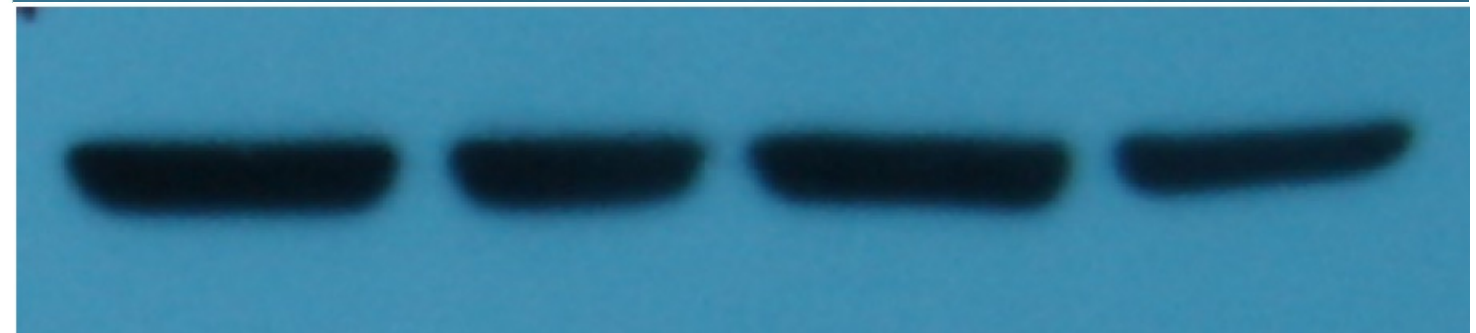

(K)

(I)

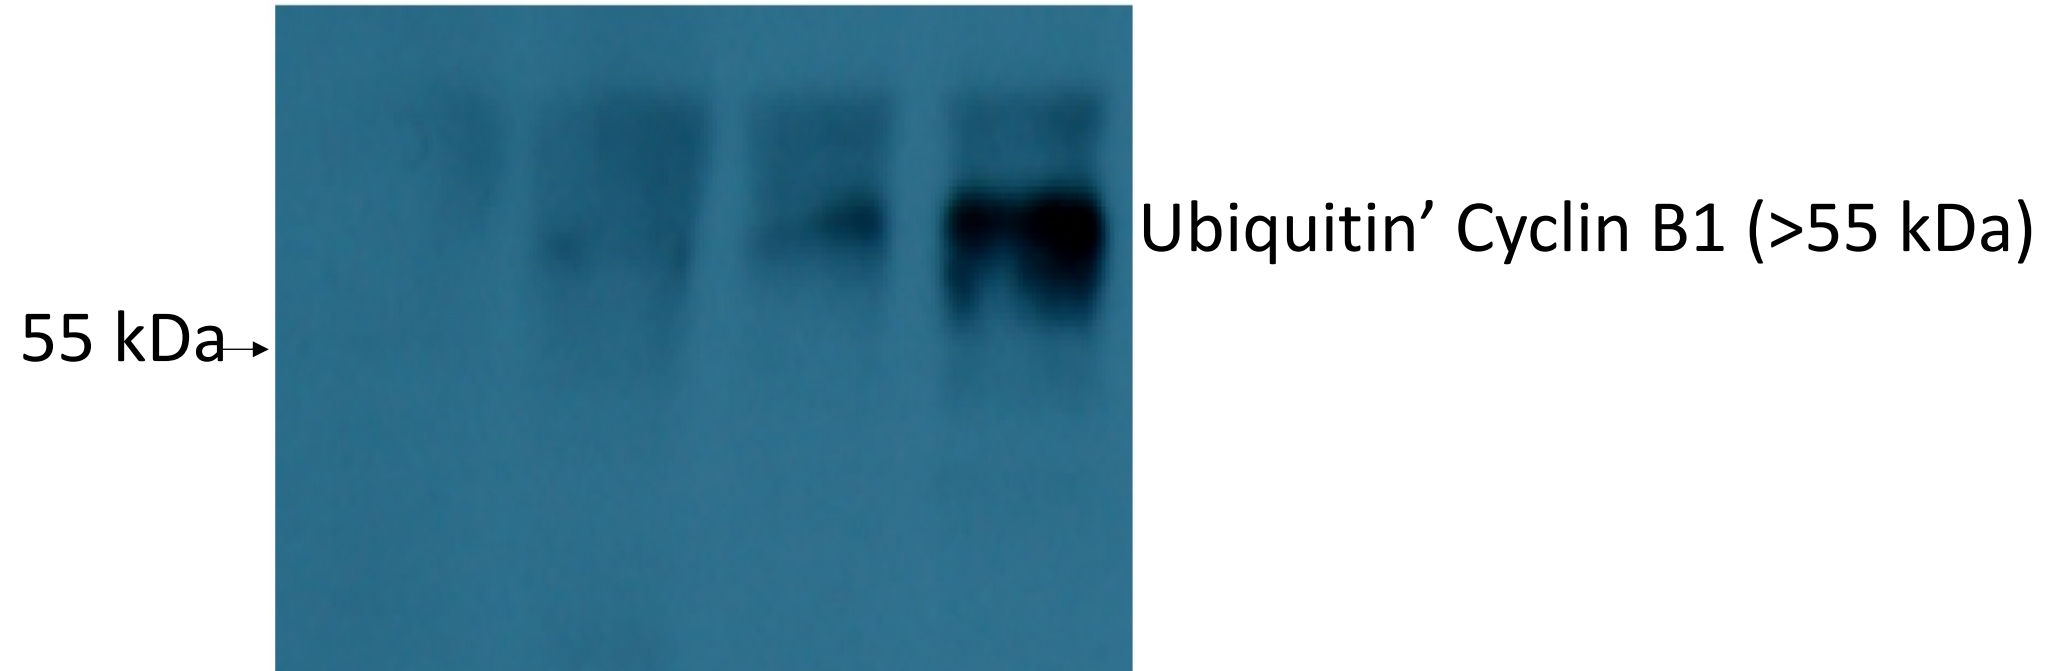

(m)

HN1 (22 kDa)

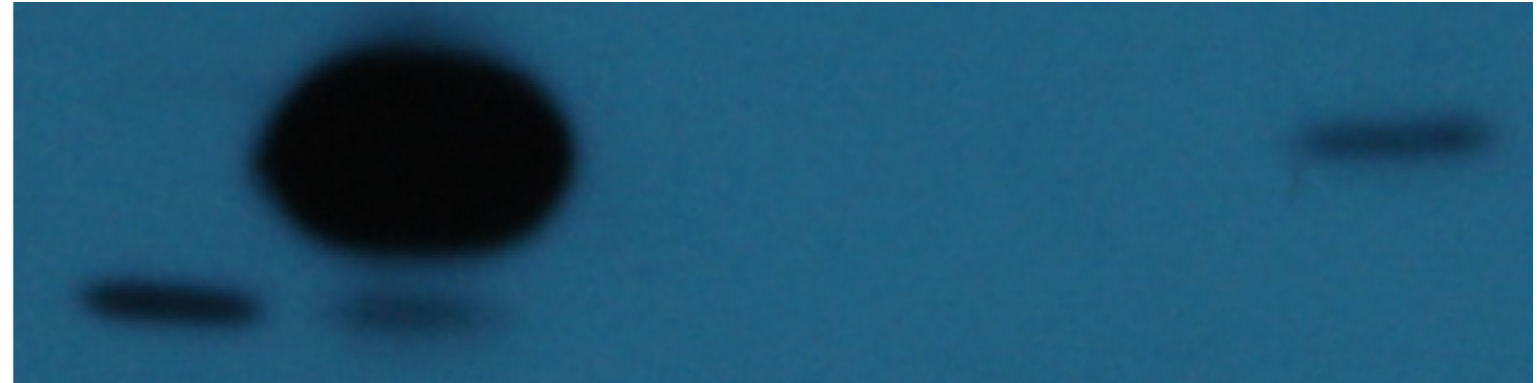

IgG (HC)

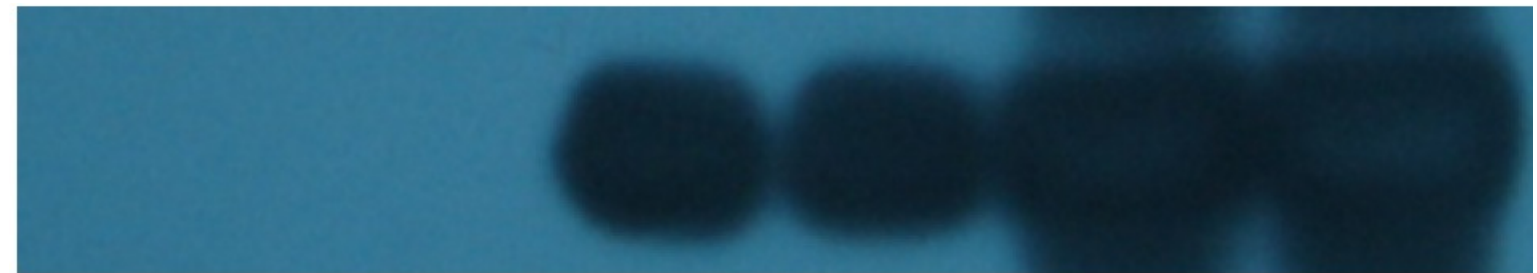

(n)

Cdh1/Fzr1 (55 kDa)

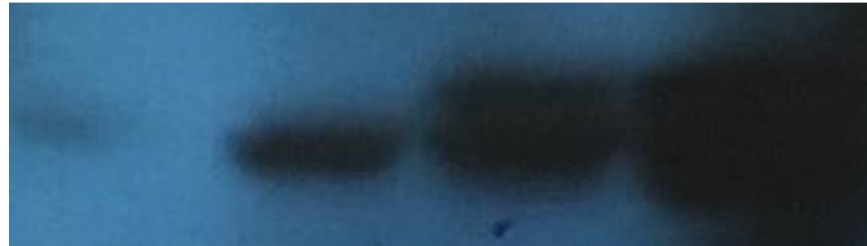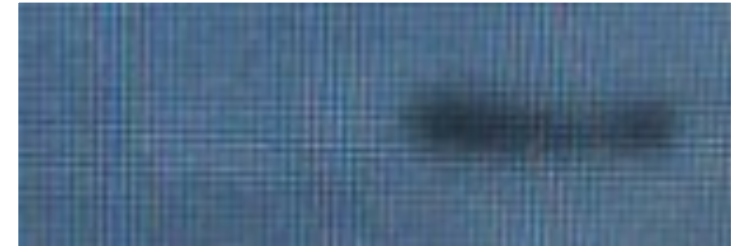

Ect-HN1 (28 kDa)

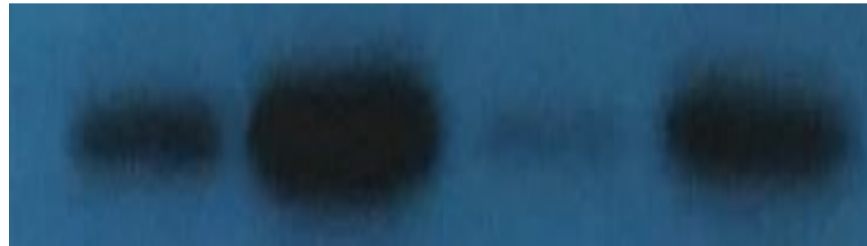

$\beta$ -actin (42 kDa)

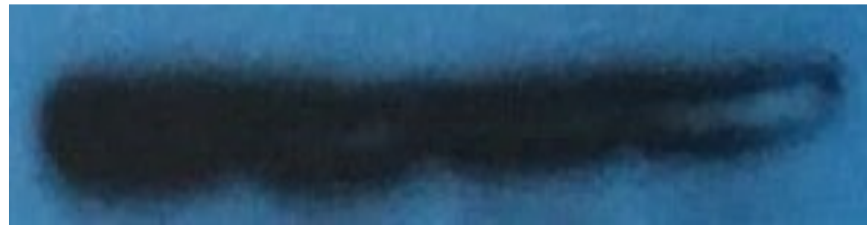



(o)

HN1 (22 kDa)

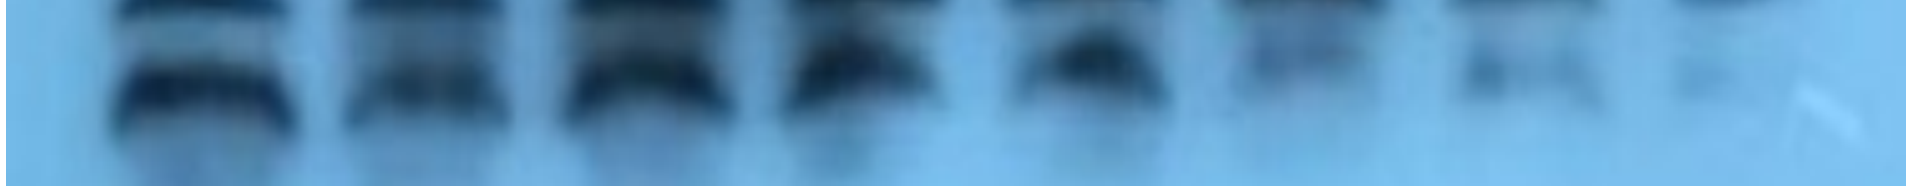

Cdk1 (34 kDa)

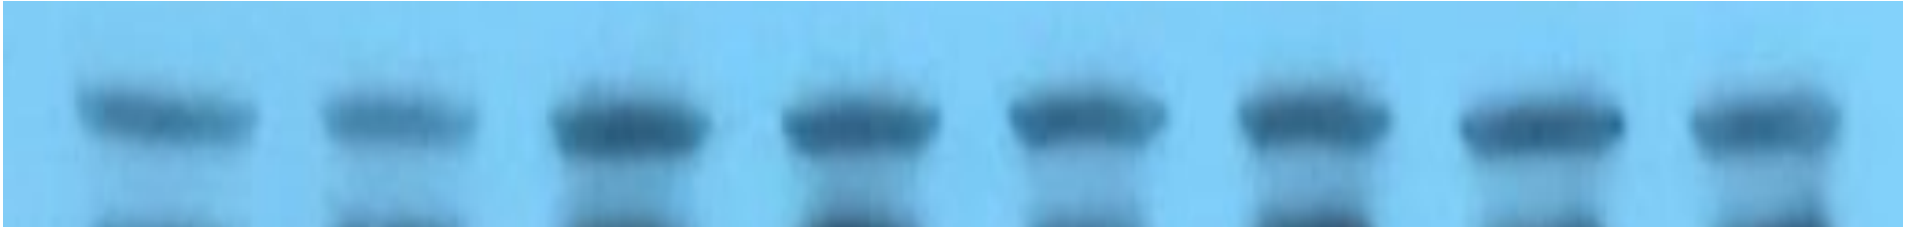

Emi1 (62 kDa)

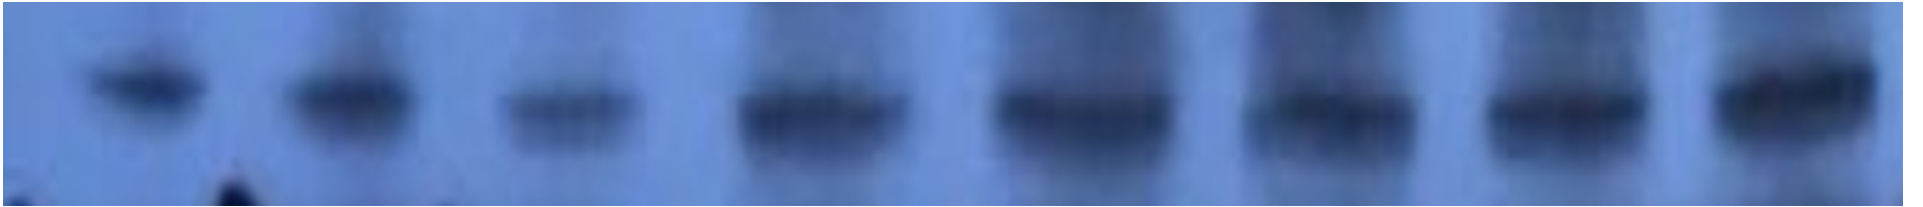

$\beta$ -actin (42 kDa)

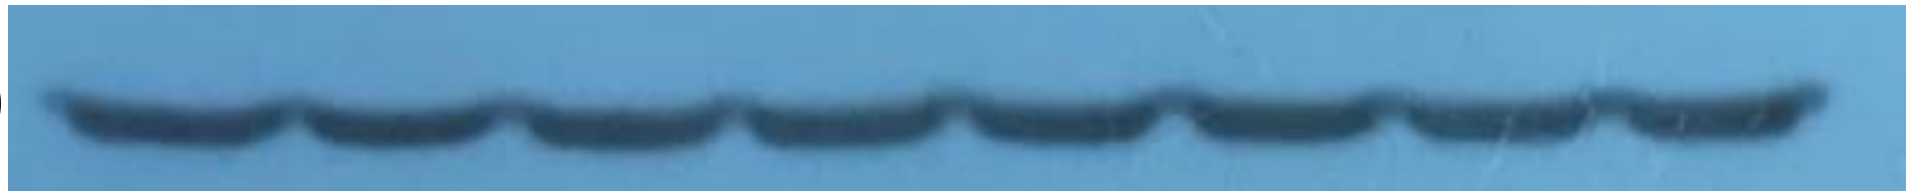

(p)

(A)

Ect-HN1 (28 kDa)

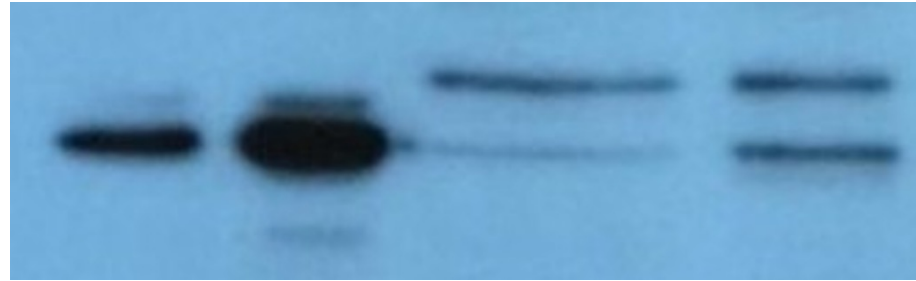

Cdt1 (65 kDa)

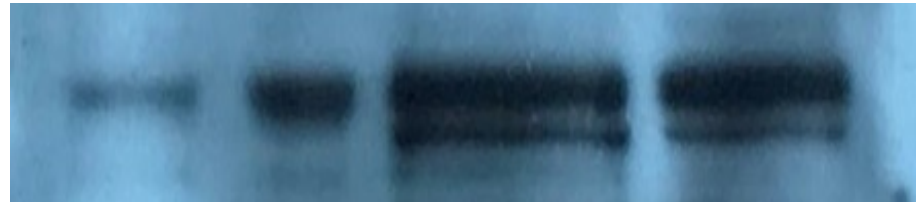

GAPDH (37 kDa)

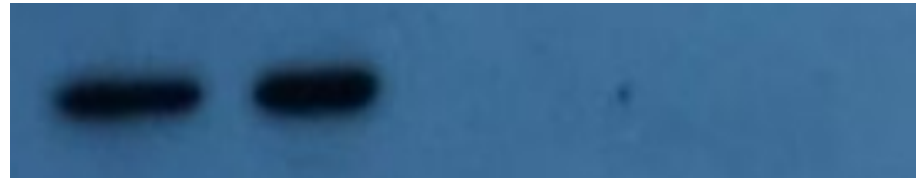

Lamin B1 (65 kDa)

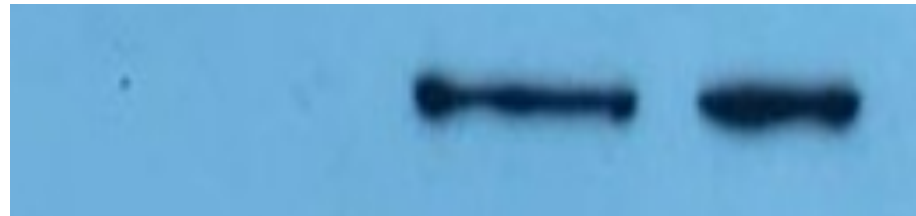

(B)

Cdt1 (65 kDa)

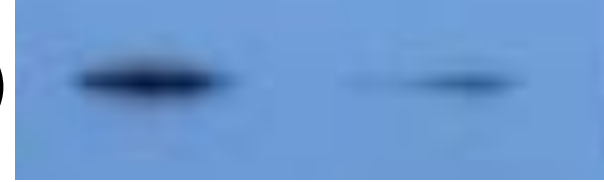

Ac-H4 (14 kDa)

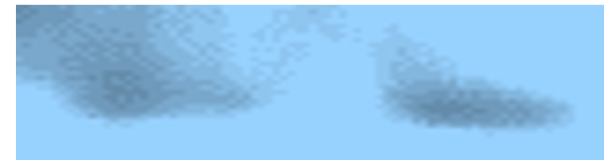

Figure S7: Original images of western blots. (a): the original image of western blots for figure 1A; (b): figure 2A; (c): figure 2B; (d): figure 2C; (e): figure 3A; (f): figure 3C; (g): figure 4A; (h): figure 4C; (i): figure 5A; (j): figure 5B; (k): figure 6A; (l): figure 5C; (m): figure 6B; (n): figure 6C; (o): figure 7; (p): figure 9A and figure 9B.
